# Supplementary material for: Orthodontic treatment needs of children with high caries using Index for Preventive and Interceptive Orthodontic Needs (IPION)
Source: Springer Nature journal article supplement (doi:10.1007/s40368-019-00453-5), 2019-05-25
Supplement: MOESM1 [file 16750936]

**Appendix: IPION9 component definition, component score and weighting score**

The original IPION is divided the components into 5 categories (Coetzee 1999). However, in this study the components were rearranged and divided in 3 groups, which were caries & early loss components, occlusal component and functional components. The definition and methods of measurement of each component and their calculation are as follows.

**1. Caries & early loss components**

- 1. **Caries**

| **Tooth** | **Component score** | **Operation scale** | **Weighting score** |
| --- | --- | --- | --- |
| Primary canines (C) | 0 | No caries | 1 |
| 1 | Caries with intact marginal ridge |
| 2 | Caries without intact marginal ridge |
| First primary molar (D) | 0 | No caries | 2 |
| 1 | Caries with intact marginal ridge |
| 2 | Caries without intact marginal ridge |
| Second primary molar (E) | 0 | No caries | 4 |
| 1 | Caries with intact marginal ridge |
| 2 | Caries without intact marginal ridge |
| Permanent first molar | 0 | No caries | 4 |
| 1 | Caries with intact marginal ridge |
| 2 | Caries without intact marginal ridge |
| x | Not visible intraorally |
| Remark: Scores are recorded for both the upper and lower primary molars and cuspids as well as for the first permanent molars. Occlusal and interproximal carious lesions are recorded. Scores are noted according to the number of teeth involved. | | | |

- 1. **Early loss of primary tooth**

| **Tooth** | **Component score** | **Operation scale** | **Weighting score** |
| --- | --- | --- | --- |
| Upper second primary molar (upper E) | 0 | Present | 2 |
| 1 | Not present |
| Lower second primary molar (lower E) | 0 | Present | 3 |
| 1 | Not present |
| Remark: A score is recorded where the second primary molars are still present in the dental arches. | | | |

**2. Occlusal components**

**2.1 Submerge of primary teeth (ankylosed teeth)**

| **Tooth** | **Component score** | **Operation scale** | **Weighting score** |
| --- | --- | --- | --- |
| First primary molar | 0 | No | 1 |
| 1 | Yes |
| Second primary molar | 0 | No | 2 |
| 1 | Yes |
| Remark: Any primary molar of which the occlusal surface is situated inferior to the occlusal plane is scored as submerge. | | | |

**2.2 Supernumerary teeth**

| **Organ** | **Component score** | **Operation scale** | **Weighting score** |
| --- | --- | --- | --- |
| Supernumerary teeth | 0 | No | 4 |
| 1 | Yes |
| Remark: The number of supernumerary teeth present in the mouth mesial to the canines is recorded. No supplementary radiograph is used. | | | |

**2.3 Diastema**

| **Characteristic** | **Component score** | **Operation scale** | **Weighting score** |
| --- | --- | --- | --- |
| Upper diastema | 0 | Less than or equal to 2mm. | 4 |
| 1 | Greater than 2mm. |
| x | Not measurable |
| Remark: Scores are recorded for the upper anterior segment only. | | | |

**2.4 Absent permanent incisors (Original VS Modified)**

| **Characteristic** | **Component score** | **Operation scale** | | **Weighting score** |
| --- | --- | --- | --- | --- |
| Absent permanent incisors | 0 | No | | 3 |
| 1 | Yes | |
| Remark: Due to the chronological age and dental age not being concomitant, this study used the modified version to detect the absent of permanent incisors. | | | | |
| **Original IPION** | | | **Modified** | |
| All absent permanent incisors are recorded regardless of the cause. Scores are recorded for both upper and lower anterior segments by counting the number of permanent incisors absent. If one or more primary incisors is still present and the permanent incisor/s is not visible during clinical examination it is regarded as absent. In cases where all eight permanent incisors are present the score will be 0. | | | Scores are recorded for both upper and lower anterior segments by counting the number of permanent incisors absent. Absence of permanent incisors is recorded when permanent premolar or canine in the same arch is present, according to sequence of normal tooth eruption (Proffit et al. 2013). | |

**2.5 Rotation of upper permanent molar**

| **Characteristic** | **Component score** | **Operation scale** | **Weighting score** |
| --- | --- | --- | --- |
| Rotation of upper permanent molar | 0 | No | 4 |
| 1 | Yes |
| x | Not measurable |
| Remark: The number of mesially rotated upper molars is recorded. Mesial rotation is confirmed when the extension of an imaginary line between the disto-buccal cusp and the mesio-lingual cusp of the upper molar crosses distal to the contact point of the contralateral first and second primary molar. If rotation can not be measured due to unerupted or partially erupted first permanent molars, it is recorded as "not measurable" (X). | | | |

**2.6 Tipping of lower permanent molar**

| **Characteristic** | **Component score** | **Operation scale** | **Weighting score** |
| --- | --- | --- | --- |
| Tipping of lower permanent molar ≥ 25° | 0 | No | 4 |
| 1 | Yes |
| x | Not measurable |
| Remark: When recording mesial tip of the lower molars, the side of the ruler is held parallel to the gingival margins of the lower arch. If the long axis of the lower molar is inclined more acutely than the oblique side of the ruler (more than 25°), it is scored. If tipping can not be measured due to unerupted or partially erupted first permanent molars, it was recorded as “not measurable” (X). | | | |

**2.7 Impeded (ectopic) eruption of first permanent molars**

| **Characteristic** | **Component score** | **Operation scale** | **Weighting score** |
| --- | --- | --- | --- |
| Impeded (ectopic) eruption of first permanent molars | 0 | No | 4 |
| 1 | Yes |
| Remark: The number of first permanent molars not fully erupted into occlusion was noted, whether caused by ankylosis, ectopic eruption or any other known or unknown reason. | | | |

**2.8 Overjet**

| **Characteristic** | **Component score** | **Operation scale** | **Weighting score** |
| --- | --- | --- | --- |
| Overjet | 0 | 0 - 3 mm. | 4 |
| 1 | 3.1 - 5 mm. |
| 2 | 5.1 - 7 mm. |
| 3 | 7.1 – 9 mm. |
| 4 | More than 9 mm. |
| x | Not measurable |
| Remark: The most prominent incisor overjet is identified and the overjet is recorded in relation to the labial aspect of the incisal edge. If the overjet can not be measured due to exfoliation of the primary incisors, it i's recorded as "not measurable". | | | |

**2.9 Anterior crossbite**

| **Characteristic** | **Component score** | **Operation scale** | **Weighting score** |
| --- | --- | --- | --- |
| Anterior Crossbite | 0 | No crossbite. | 10 |
| 1 | One or more teeth edge-to-edge. |
| 2 | One or two teeth in crossbite. |
| 3 | More than two teeth in crossbite. |
| Remark: If one or more incisors or canines are in crossbite, while a positive overbite exists as well, the two scores are summed. | | | |

**2.10 Overbite and openbite**

| **Characteristic** | **Component score** | **Operation scale** | **Weighting score** |
| --- | --- | --- | --- |
| Overbite | 0 | Less than or equal to 2/3 coverage of lower incisors | 1 |
| 1 | Greater than 2/3 coverage of the lower incisor, but less than full coverage |
| 2 | Greater than or equal to full coverage of the lower incisor |
| x | Not measurable |
| Openbite | 0 | No open bite | 4 |
| 1 | Less than or equal to 1mm. open bite |
| 2 | 1.1-2 mm. open bite |
| 3 | 2.1-3 mm. open bite |
| 4 | Greater than or equal to 3.1mm. open bite |
| Remark: The worst vertical overlap or open bite of any of the four incisors is recorded. Overbite is recorded in relation to the coverage of the lower incisors or the degree of open bite. If the overbite can not be measured (e.g. exfoliation of the primary incisors), it is recorded as "not measurable". | | | |

**2.11 Antero-posterior molar relationship (Original VS Modified)**

Due to the **unclear definition** of the original IPION scale, this study has modified the scale of IPION as the following.

| **Permanent molar relationship** | | | | | |
| --- | --- | --- | --- | --- | --- |
| **Characteristic** | **Original** | | **Modified** | | **Weighting score** |
| **Component score** | **Operation scale** | **Component score** | **Operation scale** |
| Permanent molar relationship | 0 | Class I / Normal | 0 | Class I (0-2mm) | 1 |
| 0 or 5 | Class III | 5 | Class III (>2mm) |
| 2 | Class II | 2 | Class II |
| Remark: The relationship between the first permanent molars is recorded for both left and right sides. Recordings are made with the teeth in occlusion.   - A Class I normal molar relationship is recorded when the mesio-buccal cusp of the upper first permanent molar occludes anywhere between the buccal groove and the tip of the mesial cusp of the opposing lower first permanent molar. - A Class II molar relationship is recorded when the mesio-buccal cusp of the upper first permanent molar occludes anywhere mesial to the tip of the mesial cusp of the opposing lower first permanent molar. - A Class III molar relationship is when the mesio-buccal cusp of the upper first permanent molar occludes anywhere distal to the buccal groove of the opposing lower first permanent molar.   Note: If one or more first permanent molars be absent or not erupted fully into occlusion, the relationship of the second primary molars are recorded. | | | | | |

| **Second primary molar relationship** | | | | | |
| --- | --- | --- | --- | --- | --- |
| **Characteristic** | **Original** | | **Modified** | | **Weighting score** |
| **Component score** | **Operation scale** | **Component score** | **Operation scale** |
| Second primary molar relationship | x | Not measure | x | Not measure | 1 |
| 0 | Flush terminal plane | 0 | Flush terminal plane |
| 0 | Mesial step < 2 mm. | 0 | 0-2 mm. |
| 0 or 5 | Mesial step ≥ 2 mm. | 5 | Mesial step > 2 mm. |
| 2 | Distal step | 2 | Distal step |
| Remark: In cases with early loss of primary molars, the molar relationship is recorded as "not measurable". | | | | | |

**2.12 Transverse buccal occlusion**

The transverse buccal occlusion is a buccal crossbite and scissors bite of posterior tooth (not including primary canine). Each of the right and the left sides received a score.

| **Characteristic** | **Component score** | **Operation scale** | **Weighting score by functional shift** | |
| --- | --- | --- | --- | --- |
| **No** | **Yes** |
| Crossbite | 0 | No crossbite | 1 | 10 |
| 1 | Crossbite tendency (teeth in an edge-to-edge relationship noted). |
| 2 | Single tooth in crossbite. |
| 3 | More than one tooth in crossbite. |
| 4 | More than one tooth in scissor bite. |
| Remark:  1) The buccal occlusion is recorded for both left and right sides. The fit of the teeth is recorded in the transverse plane. The recording zone is from the first primary molar/first premolar to the last molar. All features are recorded when the teeth are in occlusion.   - A crossbite is scored when the buccal cusps of the maxillary posterior teeth are lingual to the mandibular posterior teeth during intercuspation. - A scissors bite is where the palatal cusps of the maxillary posterior teeth are biting buccal to the mandibular posterior teeth. - A crossbite tendency is where the maxillary and mandibular posterior teeth are biting in a cusp-to-cusp transverse relationship during intercuspation. The teeth are neither in a full crossbite, nor in scissors bite.   2) The functional shift was record when the child has any tooth interference (premature contact) is observed during lower jaw is closing to habitual occlusion. | | | | |

**3. Functional components**

**3.1 Incompetent lip**

| **Characteristic** | **Component score** | **Operation scale** | **Weighting score** |
| --- | --- | --- | --- |
| Lip competency | 0 | Lips sealed at rest | 1 |
| 1 | ≤ 4 mm space between lips at rest |
| 2 | > 4 mm space between lips at rest |
| Remark: Incompetent lip seal is scored if the lips are not in contact during rest. Lips are assessed in the rest position and the interlabial gap is measured. | | | |

**3.2 Active frenum**

| **Organ** | **Component score** | **Operation scale** | **Weighting score** |
| --- | --- | --- | --- |
| Frenum | 0 | No | 1 |
| 1 | Yes |
| Remark: The presence of an active frenum is scored if the interdental papilla between the upper central incisors blanches when mild to moderate traction is applied to the labial frenum. | | | |

The score is calculated by summing all affected characteristics (components) which are multiplied with the component scores and their weighting scores, as follow.

IPION score = Σ characteristics (component score x weighting score)

The cut-off scores of each preventive and interceptive orthodontic treatments are “no treatment need (score 0-5)”, “moderate treatment need (score 6-14)” and “definite treatment need (score ≥15)”.

**Reference**

Coetzee CE. Development of an index for preventive and interceptive orthodontic needs (IPION)

[dissertation]. Pretoria: University of Pretoria; 1999.

Proffit WR, Fields Jr HW, Sarver DM, Ackerman JL. Contemporary orthodontics. 5th ed, St. Louis:

ELSEVIER MOSBY; 2013. pp.82-3.
